# Supplementary material
Source: MDPI journal article supplement (https://www.mdpi.com/2073-4344/11/6/656)
Supplement: s1 [file s1]

## Supplementary Materials

### **Immobilization of an Iridium(I)-NHC-phosphine catalyst for hydrogenation reactions under batch and flow conditions**

Henrietta Kovács<sup>1,2</sup>, Krisztina Orosz<sup>1,2</sup>, Gábor Papp<sup>1</sup>, Ferenc Joó<sup>1,3</sup>, and Henrietta Horváth<sup>3,\*</sup>

<sup>1</sup> Department of Physical Chemistry, University of Debrecen, P.O.Box 400, Debrecen, H-4002 Hungary

<sup>2</sup> Doctoral School of Chemistry, University of Debrecen, P.O.Box 400, Debrecen, H-4002 Hungary

<sup>3</sup> MTA-DE Redox and Homogeneous Catalytic Reaction Mechanisms Research Group, P.O.Box 400, Debrecen, H-4002 Hungary

Corresponding author: Henrietta Horváth, e-mail: [henrietta.horvath@science.unideb.hu](mailto:henrietta.horvath@science.unideb.hu)

## Table of contents

Equipment and methods used in this study

Figure S1. Optical microscopy photographs of Lewatit MonoPlus MP 500 anion exchanger and  $\text{Na}_2[\text{Ir}(\text{cod})(\text{emim})(\text{mtppts})]$ @Lewatit MonoPlus MP 500 catalyst.

Figure S2. Infrared spectra of Lewatit MonoPlus MP 500 anion exchanger and  $\text{Na}_2[\text{Ir}(\text{cod})(\text{emim})(\text{mtppts})]$ @Lewatit MonoPlus MP 500 catalyst.

Figure S3. Infrared spectra of  $\text{Na}_2[\text{Ir}(\text{cod})(\text{emim})(\text{mtppts})]$  complex catalyst, before and after hydrogenation.

Figure S4. GC-MS detection of cyclooctane formed in the hydrogenation of  $\text{Na}_2[\text{Ir}(\text{cod})(\text{emim})(\text{mtppts})]$  in methanol solvent.

Figure S5. Time course of hydrogenation of phenylacetylene and the ratio of styrene and ethylbenzene catalyzed homogeneously by  $\text{Na}_2[\text{Ir}(\text{cod})(\text{emim})(\text{mtppts})]$  in batch reactions.

Figure S6. Time course of hydrogenation of phenylacetylene and the ratio of styrene and ethylbenzene catalyzed by heterogeneous  $\text{Na}_2[\text{Ir}(\text{cod})(\text{emim})(\text{mtppts})]$ @Lewatit MonoPlus MP 500 in batch reactions.

Figure S7. Effect of water on the hydrogenation of phenylacetylene and the ratio of styrene and ethylbenzene catalyzed homogeneously by  $\text{Na}_2[\text{Ir}(\text{cod})(\text{emim})(\text{mtppts})]$  in batch reactions.

Figure S8. Effect of water on the hydrogenation of phenylacetylene and the ratio of styrene and ethylbenzene catalyzed by heterogeneous  $\text{Na}_2[\text{Ir}(\text{cod})(\text{emim})(\text{mtppts})]$ @Lewatit MonoPlus MP 500 in batch reactions.

Figure S9. Effect of water on the hydrogenation of diphenylacetylene and the ratio of *cis*-stilbene and *trans*-stilbene catalyzed homogeneously by  $\text{Na}_2[\text{Ir}(\text{cod})(\text{emim})(\text{mtppts})]$  in batch reactions.

Figure S10. Effect of water on the hydrogenation of diphenylacetylene and the ratio of *cis*-stilbene and *trans*-stilbene catalyzed by heterogeneous  $\text{Na}_2[\text{Ir}(\text{cod})(\text{emim})(\text{mtppts})]$ @Lewatit MonoPlus MP 500 in batch reactions.

Figure S11.  $^1\text{H}$  NMR spectrum of a reaction mixture ( $\text{CHCl}_3$  extract) in hydrogenation of levulinic acid catalyzed by the heterogeneous  $\text{Na}_2[\text{Ir}(\text{cod})(\text{emim})(\text{mtppts})]$ @Lewatit MonoPlus MP 500 catalyst in batch reaction.

Figure S12. Temperature dependence of conversion of diphenylacetylene catalyzed by  $\text{Na}_2[\text{Ir}(\text{cod})(\text{emim})(\text{mtppts})]$ @Lewatit MonoPlus MP 500 in an H-Cube flow reactor.

Figure S13. Pressure dependence of conversion of diphenylacetylene catalyzed by  $\text{Na}_2[\text{Ir}(\text{cod})(\text{emim})(\text{mtppts})]$ @Lewatit MonoPlus MP 500 in an H-Cube flow reactor.

Figure S14. Calibration curve for spectrophotometric leaching tests.

## Equipment and methods used in this study

### General

NMR measurements were carried out with the use of BRUKER DRX 360 (Company, City, State Abbr (if has), Country) or Bruker Avance I 400 MHz spectrometers. Chemical shifts were referenced to sodium 2,2-dimethyl-2-silapentane-5-sulfonate, DSS ( $^1\text{H}$ ) and to 85%  $\text{H}_3\text{PO}_4$  ( $^{31}\text{P}$ ). Infrared spectra were recorded on a Perkin Elmer Spectrum Two FT-IR Spectrometer in ATR mode.

Optical microscopy photographs were taken using an Olympus BX41 confocal microscope with USB PC controlled 3 MegaPixel camera attached to the Horiba HR Labram Evo Microscope supplied with an XY manual mechanical stage, a white light illumination system by reflection with variable light intensity.

### Anchoring of $\text{Na}_2[\text{Ir}(\text{cod})(\text{emim})(\text{mtppts})]$ on solid supports

Anion-exchange support materials were pretreated before heterogenization: they were washed alternately with 0.1 M NaOH and 0.1 M HCl three times, and finally with distilled water three times. They were dried in vacuo.

In a Schlenk tube,  $\text{Na}_2[\text{Ir}(\text{cod})(\text{emim})(\text{mtppts})]$  (60 mg) was dissolved in deoxygenated 0.01 M HCl solution (12 mL) under argon atmosphere. With the use of a syringe, the solution was added onto 360 mg of pretreated Lewatit MonoPlus MP 500 ion-exchange beads under argon atmosphere. The reaction mixture was thermostated at 40 °C for 3 hours, during which the solution decolorized, and the beads turned red. The heterogenized complex was filtered under argon, washed with hexane and dried in vacuo. Yield: 390 mg supported catalyst (96%).

### Spectrophotometric study of the immobilization process and leaching tests by acid-base treatment

The heterogenization process of  $\text{Na}_2[\text{Ir}(\text{cod})(\text{emim})(\text{mtppts})]$  was investigated at room temperature in an argon-filled inert spectrophotometric cell, with the use of a Shimadzu UV-1700 spectrophotometer. 1.5 mg solid complex and 50 mg solid support were placed into the cuvette, placed under argon, then 1 mL of deoxygenated 0.01 M HCl solution was injected through the septum of the cell. The mixture in the cell was stirred well, then placed into the

spectrophotometer, and an absorption spectrum was obtained every 4 min, while shaking the cuvette between measurements, until absorbance reached zero value, indicating the end of the heterogenization process.

The acid-base leaching tests were carried out with the use of a Hettich Benelux MHR13 heating thermoshaker. 30 mg of the heterogenized catalyst was placed into the inert, septum-closed reaction vessels, flushed with argon, and then 2 ml of 0.1 M  $\text{H}_3\text{PO}_4$  or  $\text{Na}_3\text{PO}_4$  was injected through the septum. Each sample was shaken for an hour in the thermoshaker at room temperature, and then the UV-VIS absorption spectrum was recorded. The mass of the leached complex in the solution was calculated using a calibration curve (Figure S14).

### Catalytic reactions

The reactions were performed in an H-Cube hydrogenation microreactor (ThalesNano Nanotechnology Inc, Budapest, Hungary), in continuous mode. 200 mg heterogenized catalyst was loaded into 30 × 4 mm CatCart stainless steel tubes. In continuous mode, the catalyst bed is consistently washed with the substrate solution (0.05 M phenylacetylene or 1-hexyne in methanol, 0.05 M diphenylacetylene or benzylideneacetone in toluene), without interruptions or pauses. Hydrogen was generated ‘in situ’ by the electrolysis of distilled water in the reactor. Reaction temperature ranged between 20–80 °C, pressure between 20–80 bar, and flow rate was either 0.5 or 1 mL/min in each case.

Organic-phase reaction mixtures were analyzed by gas chromatography (phenylacetylene, diphenylacetylene, 1-hexyne: Agilent 7890A equipment, OPTIMA 1 column, 30 m × 0.320 mm × 0.25 μm; benzylideneacetone: HP5890 Series II equipment, Supelcowax 10 column, 30 m × 0.320 mm × 0.25 μm). Column temperature programs were as follows. Phenylacetylene and its derivatives (OPTIMA 1 column): 80 °C for 3 min, then 100 °C/min to 250 °C, held at this temperature for 3 min. Diphenylacetylene and its derivatives (OPTIMA 1 column): 180 °C for 4 min, then 70 °C/min to 250 °C, held at this temperature for 3 min. 1-hexyne and its derivatives (OPTIMA-1 column): 40 °C for 3 min, then 100 °C/min to 250 °C, held at this temperature for 3 min. Benzylideneacetone and its derivatives (Supelcowax 10 column): 100 °C for 3 min, then 45 °C/min to 210 °C, held at this temperature for 2 min.

GC-MS measurements were carried out on a Skyray GC-MS 6800 instrument (Agilent DB-5 column).

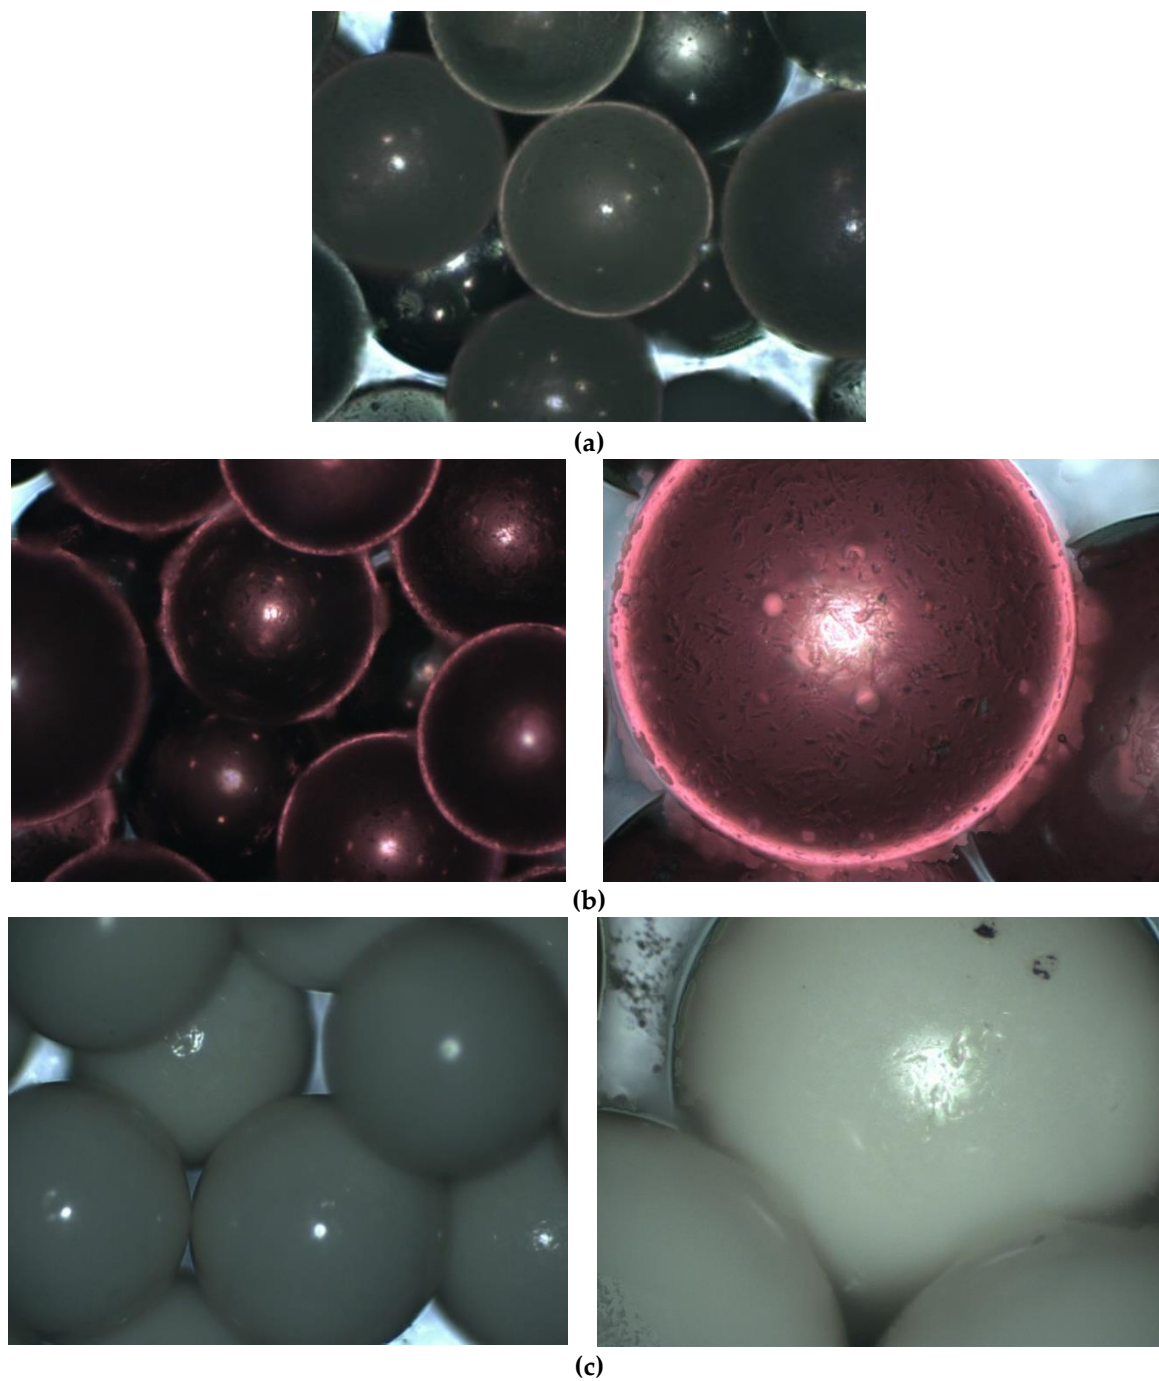

Figure S1. Optical microscopy photographs of (a) Lewatit MonoPlus MP 500 anion exchanger, in air  
(b)  $\text{Na}_2[\text{Ir}(\text{cod})(\text{emim})(\text{mtppts})]$ @Lewatit MonoPlus MP 500 before treatment with  $\text{H}_2$ , in air  
(c)  $\text{Na}_2[\text{Ir}(\text{cod})(\text{emim})(\text{mtppts})]$ @Lewatit MonoPlus MP 500 after treatment with  $\text{H}_2$

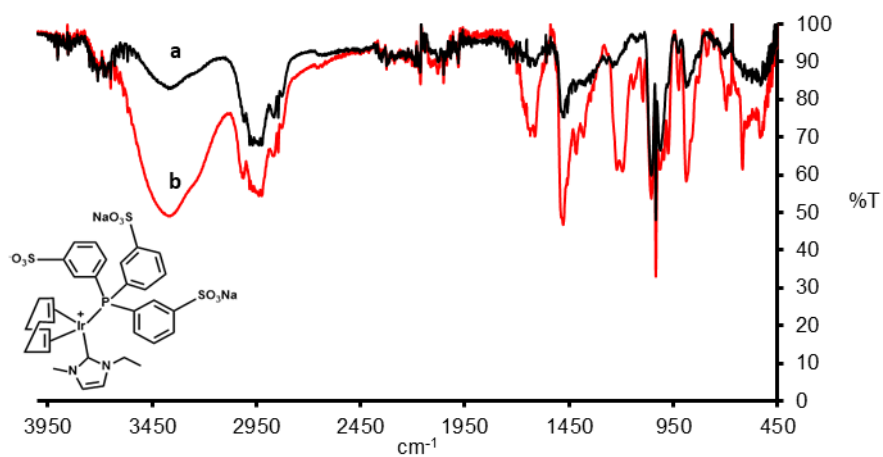

Figure S2. Infrared spectra of (a) Lewatit MonoPlus MP 500 anion exchanger and (b) Na<sub>2</sub>[Ir(cod)(emim)(mtppts)]@Lewatit MonoPlus MP 500.

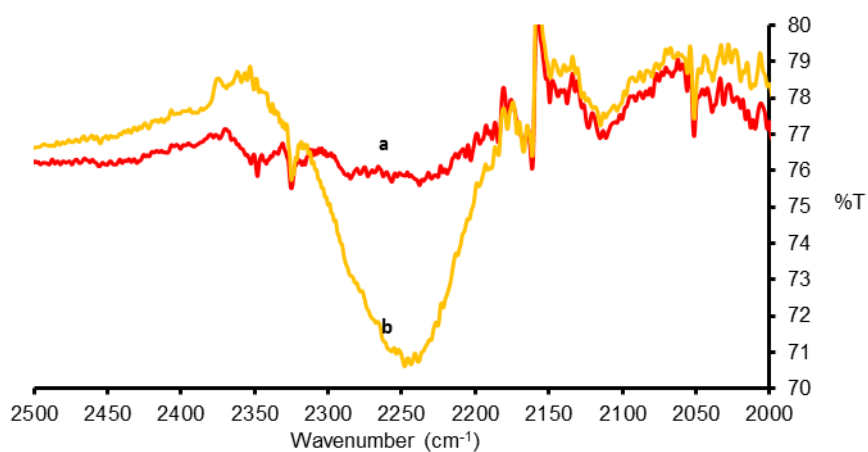

Figure S3. Infrared spectra of Na<sub>2</sub>[Ir(cod)(emim)(mtppts)] complex catalyst, (a) before hydrogenation, (b) after 1 bar H<sub>2</sub>.

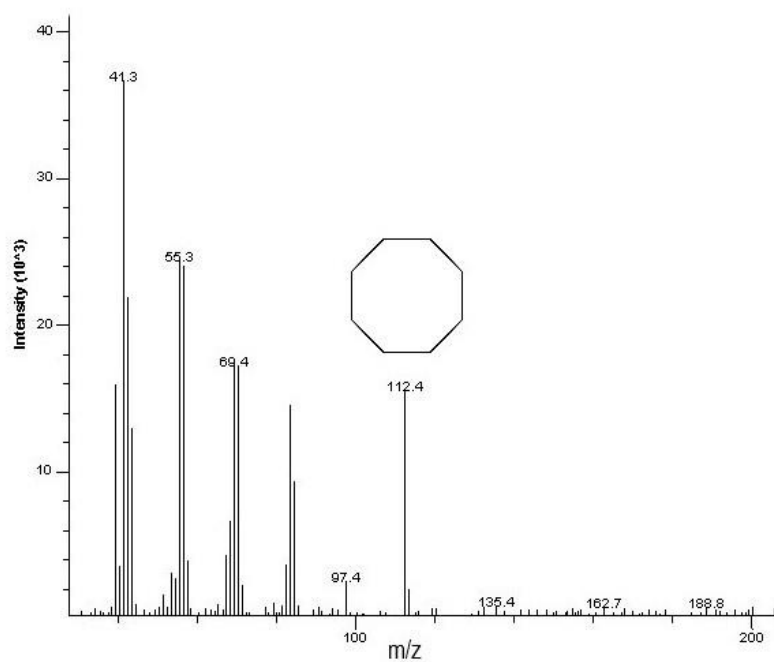

Figure S4. GC-MS detection of cyclooctane formed in the hydrogenation of  $\text{Na}_2[\text{Ir}(\text{cod})(\text{emim})(\text{mtppts})]$  in methanol solvent.

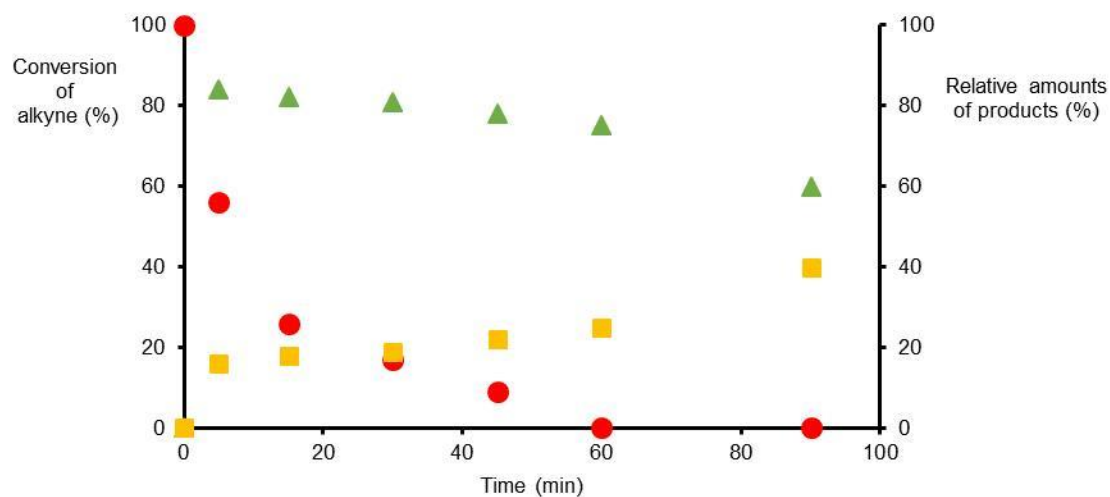

Figure S5. Time course of hydrogenation of phenylacetylene (●) and the ratio of styrene (▲) and ethylbenzene (■) catalyzed homogeneously by  $\text{Na}_2[\text{Ir}(\text{cod})(\text{emim})(\text{mtppts})]$  in batch reactions.  $[\text{substrate}] / [\text{cat}] = 100$ ,  $P(\text{H}_2) = 10$  bar,  $T = 20$  °C, solvent: methanol.

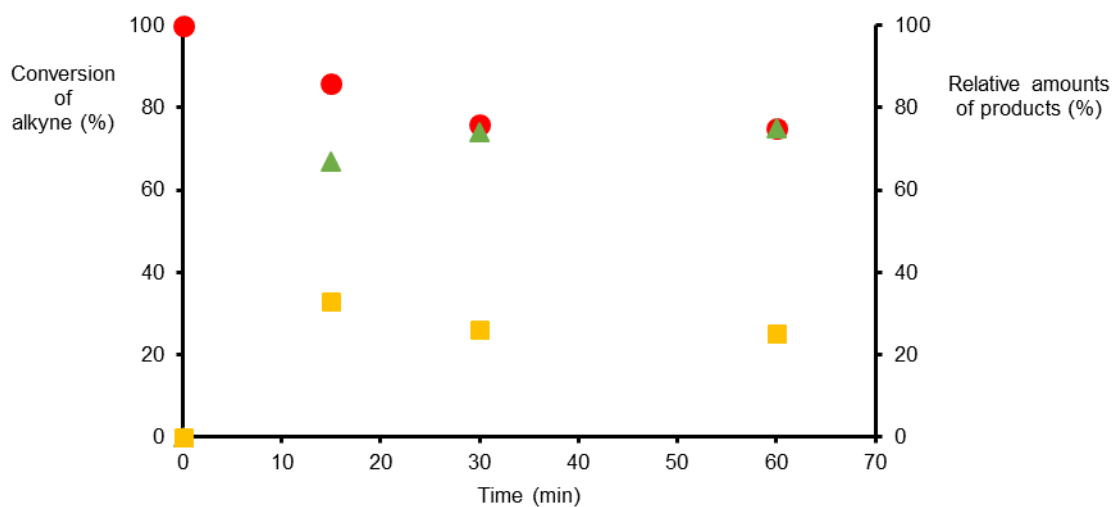

Figure S6. Time course of hydrogenation of phenylacetylene (●) and the ratio of styrene (▲) and ethylbenzene (■) catalyzed by the heterogeneous  $\text{Na}_2[\text{Ir}(\text{cod})(\text{emim})(\text{mtppts})]@\text{Lewatit MonoPlus MP 500}$  catalyst in batch reactions.  $[\text{substrate}] / [\text{cat}] = 100$ ,  $P(\text{H}_2) = 10$  bar,  $T = 20$  °C, solvent: methanol.



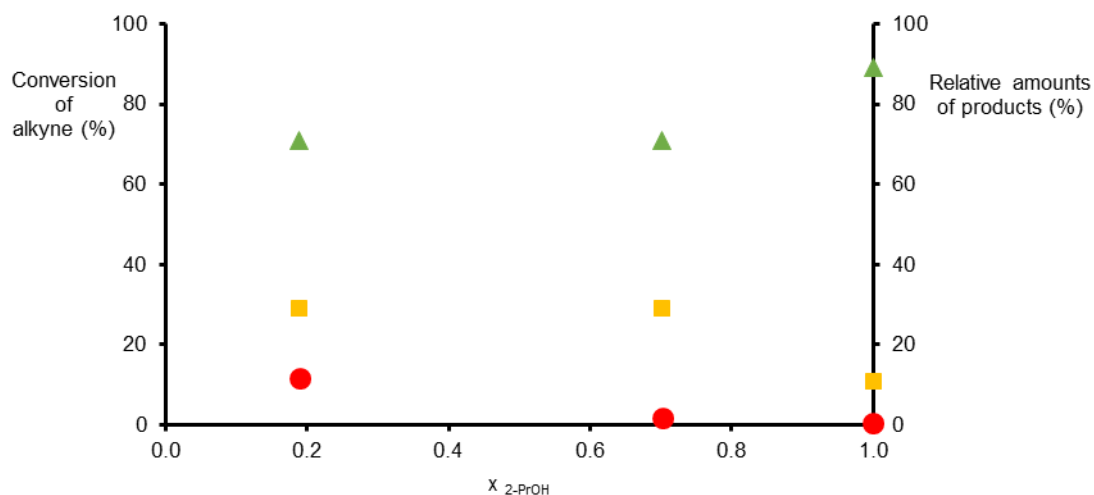

Figure S7. Effect of water on alkyne conversion (●) and the ratio of styrene (▲) and ethylbenzene (■) in hydrogenation of phenylacetylene catalyzed homogeneously by  $\text{Na}_2[\text{Ir}(\text{cod})(\text{emim})(\text{mtppts})]$  in batch reactions.  $[\text{substrate}] / [\text{cat}] = 100$ ,  $P(\text{H}_2) = 10$  bar,  $T = 20$  °C,  $t = 30$  min, solvent: water/2-propanol.

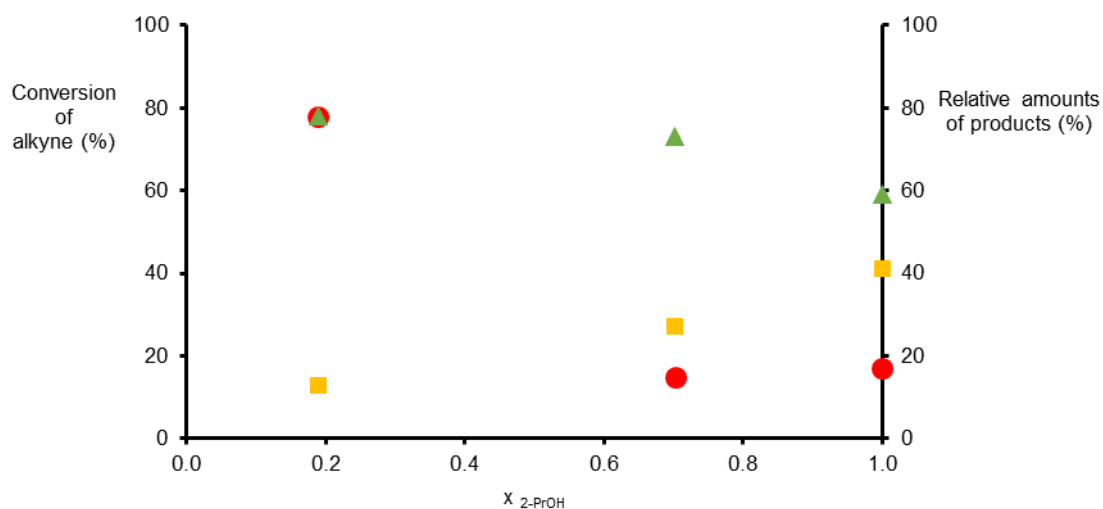

Figure S8. Effect of water on alkyne conversion (●) and the ratio of styrene (▲) and ethylbenzene (■) in hydrogenation of phenylacetylene catalyzed by the heterogeneous  $\text{Na}_2[\text{Ir}(\text{cod})(\text{emim})(\text{mtppts})]@\text{Lewatit MonoPlus MP 500}$  catalyst in batch reactions.  $[\text{substrate}] / [\text{cat}] = 100$ ,  $P(\text{H}_2) = 10$  bar,  $T = 20$  °C,  $t = 30$  min, solvent: water/2-propanol.

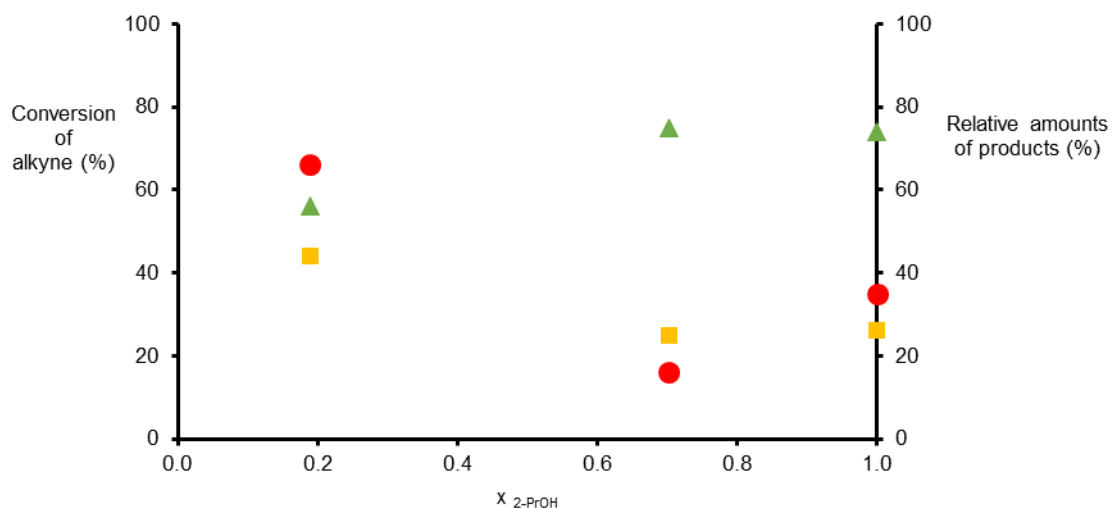

Figure S9. Effect of water on alkyne conversion (●) and the ratio of *cis*-stilbene (▲) and *trans*-stilbene (■) in hydrogenation of diphenylacetylene homogeneously catalyzed by  $\text{Na}_2[\text{Ir}(\text{cod})(\text{emim})(\text{mtppts})]$  in batch reactions.

[substrate] / [cat] = 100,  $P(\text{H}_2)$  = 10 bar,  $T$  = 70 °C,  $t$  = 30 min, solvent = water/2-propanol.

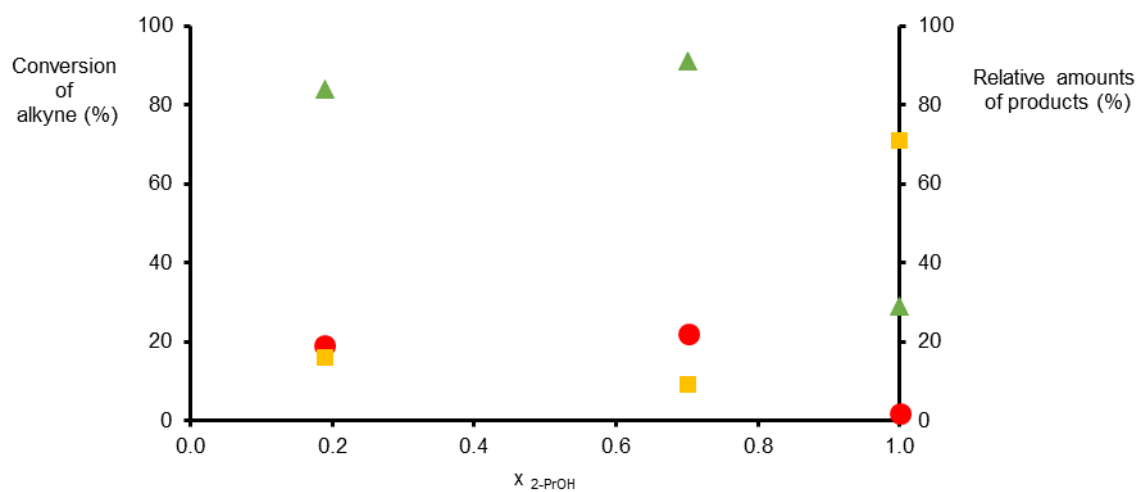

Figure S10. Effect of water on the conversion of diphenylacetylene (●) and the ratio of *cis*-stilbene (▲) and *trans*-stilbene (■) in hydrogenation catalyzed by the heterogeneous  $\text{Na}_2[\text{Ir}(\text{cod})(\text{emim})(\text{mtppts})]@\text{Lewatit MonoPlus MP 500}$  catalyst in batch reactions.

[substrate] / [cat] = 100,  $P(\text{H}_2)$  = 10 bar,  $T$  = 70 °C,  $t$  = 30 min, solvent: water/2-propanol.

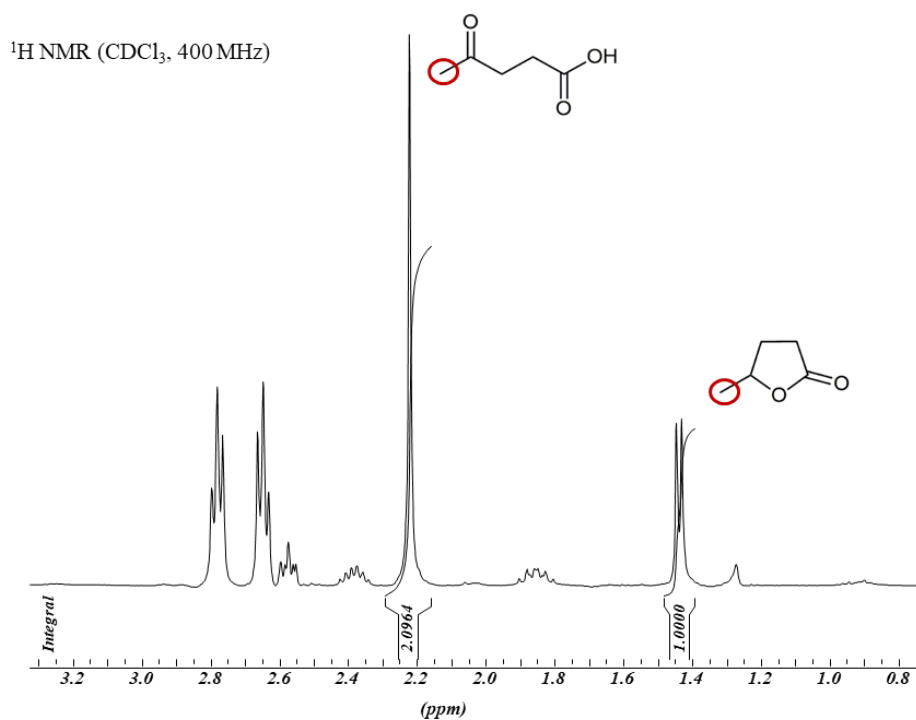

Figure S11.  $^1\text{H}$  NMR spectrum of a reaction mixture ( $\text{CHCl}_3$  extract) in hydrogenation of levulinic acid catalyzed by the heterogeneous  $\text{Na}_2[\text{Ir}(\text{cod})(\text{emim})(\text{mtppts})]@\text{Lewatit MonoPlus MP 500}$  catalyst in batch reaction.

Conditions:  $n(\text{catalyst}) = 0.01$  mmol,  $[\text{substrate}] / [\text{cat}] = 50$ ,  $P(\text{H}_2) = 10$  bar,  $T = 70$   $^\circ\text{C}$ ,  $t = 2$  h, solvent: water, 3 mL.

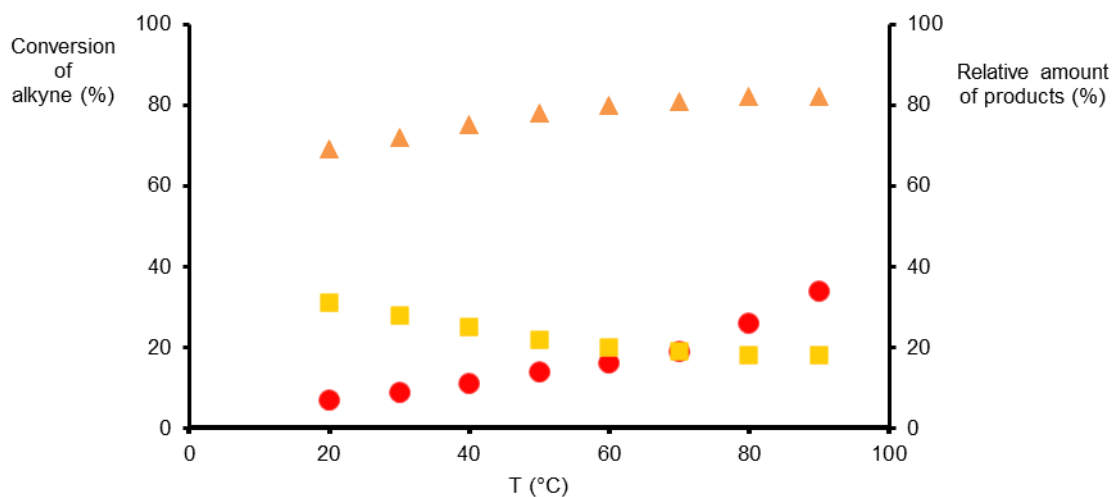

Figure S12. Temperature dependence of alkyne conversion (●) and the ratio of *cis*-stilbene (▲) and *trans*-stilbene (■) in hydrogenation of diphenylacetylene catalyzed by  $\text{Na}_2[\text{Ir}(\text{cod})(\text{emim})(\text{mtppts})]$ @Lewatit MonoPlus MP 500 in an H-Cube flow reactor.

$c(\text{alkyne}) = 0.05 \text{ M}$ ,  $m(\text{cat}) = 200 \text{ mg}$ ,  $P(\text{H}_2) = 20 \text{ bar}$ ,  $T = 20\text{--}90 \text{ }^{\circ}\text{C}$ ,  $v = 1.0 \text{ mL/min}$ , solvent: methanol.

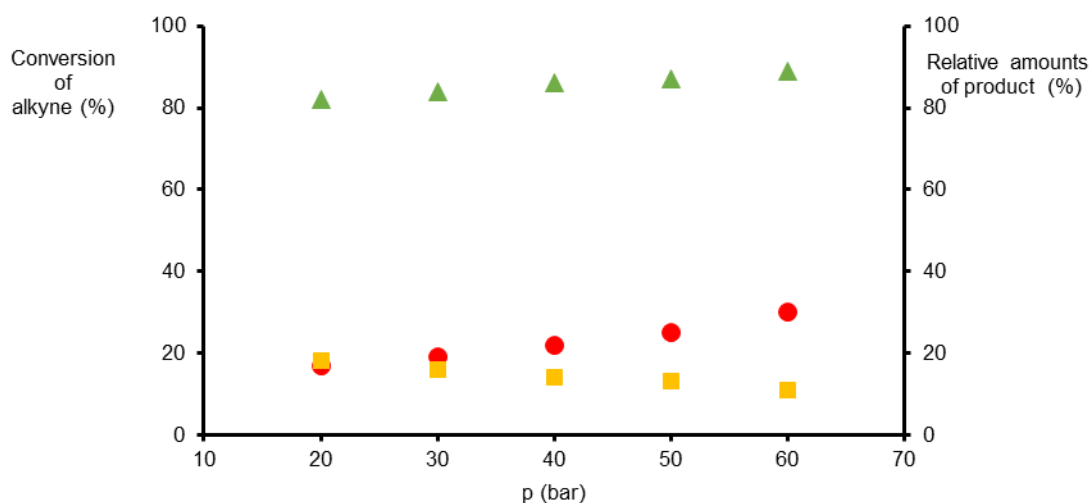

Figure S13. Pressure dependence of alkyne conversion (●) and the ratio of *cis*-stilbene (▲) and *trans*-stilbene (■) in hydrogenation of diphenylacetylene catalyzed by  $\text{Na}_2[\text{Ir}(\text{cod})(\text{emim})(\text{mtppts})]$ @Lewatit MonoPlus MP 500 in an H-Cube flow reactor.

$c(\text{alkyne}) = 0.05 \text{ M}$ ,  $m(\text{cat}) = 200 \text{ mg}$ ,  $P(\text{H}_2) = 20\text{--}60 \text{ bar}$ ,  $T = 60 \text{ }^{\circ}\text{C}$ ,  $v = 1.0 \text{ mL/min}$ , solvent: toluene.

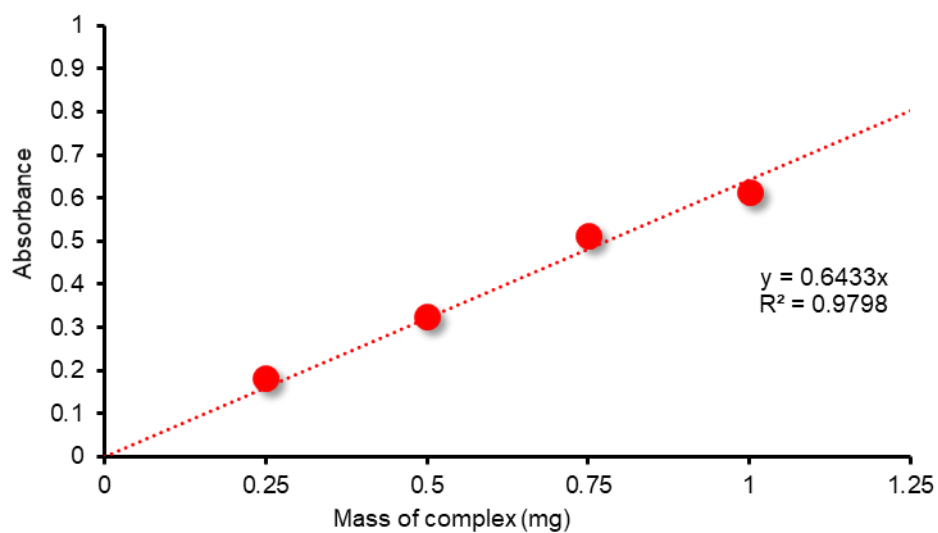

Figure S14. Calibration curve for spectrophotometric leaching tests.  
 $m(\text{Na}_2[\text{Ir}(\text{cod})(\text{emim})(\text{mtppts})]) = 0.25, 0.5, 0.75, 1.0 \text{ mg}$ ,  $V(\text{H}_2\text{O}) = 2.5 \text{ mL}$ ,  $\lambda = 400 \text{ nm}$ ,  $T = \text{r.t.}$
